# Supplementary material for: Assessment of Diabetic Retinopathy Using Nonmydriatic Ultra-Widefield Scanning Laser Ophthalmoscopy (Optomap) Compared With ETDRS 7-Field Stereo Photography
Source: PubMed Central journal article supplement — Diabetes Care. 2012 Nov 14;35(12):2459–63. doi: 10.2337/dc12-0346 (PMC3507573; doi:10.2337/dc12-0346), 2012-11-14
Supplement: supp_dc12-0346v120346_DC120346SupplementaryData.pdf [file supp_dc12-0346v120346_DC120346SupplementaryData.pdf]

SUPPLEMENTARY DATA

**Supplementary Table 1.** Clinical assessment of diabetic retinopathy

| International DR Level                                | Frequency | Percentage | Cumulative Percentage |
|-------------------------------------------------------|-----------|------------|-----------------------|
| No diabetic retinopathy (ETDRS level 10-14),          | 24        | 16,7       | 16,7                  |
| Mild non proliferative DR (ETDRS level 15-20)         | 2         | 1,4        | 18,1                  |
| Moderate non-proliferative DR (ETDRS level 35-47)     | 85        | 59,0       | 77,1                  |
| Severe non-proliferative DR (ETDRS level 53)          | 5         | 3,5        | 80,6                  |
| Proliferative diabetic retinopathy (ETDRS >=level 61) | 28        | 19,4       | 100,0                 |
| Total                                                 | 144       | 100,0      |                       |
| CSME                                                  | Frequency | Percentage | Cumulative Percentage |
| No                                                    | 105       | 67,7       | 67,7                  |
| Yes                                                   | 50        | 32,3       | 100,0                 |
| Total                                                 | 155       | 100,0      |                       |

**Supplementary Table 2.** Agreement of clinical assessment with Diabetic Retinopathy Severity and CSME imaging readings

|                              | Diabetic Retinopathy Severity (ETDRS scale) |                                  | CSME                        |                                  |
|------------------------------|---------------------------------------------|----------------------------------|-----------------------------|----------------------------------|
|                              | <i>Optomap (n=144 eyes)</i>                 | <i>7 field Foto (n=144 eyes)</i> | <i>Optomap (n=155 eyes)</i> | <i>7 field Foto (n=155 eyes)</i> |
| <b>Exact Agreement</b>       | 95.8%                                       | 90.3%                            | 87.7%                       | 83.2%                            |
| <b>Agreement +/- 1 step</b>  | 100%                                        | 96.5%                            | NA                          | NA                               |
| <b>Agreement +/- 2 steps</b> | 100%                                        | 100%                             | NA                          | NA                               |
| <b>Kappa (SE)</b>            | 0.93 (0.03)                                 | 0.83 (0.04)                      | 0.72 (0.06)                 | 0.59 (0.07)                      |

NA: not applicable, SE: standard error.

**All Grader 1 results are shown.**
